# Supplementary material for: Structure of MERS-CoV spike receptor-binding domain complexed with human receptor DPP4
Source: PubMed Central journal article supplement — Cell Res. 2013 Jul 9;23(8):986–93. doi: 10.1038/cr.2013.92 (PMC3731569; doi:10.1038/cr.2013.92), 2013-07-09
Supplement: cr201392x5.pdf [file cr201392x5.pdf]

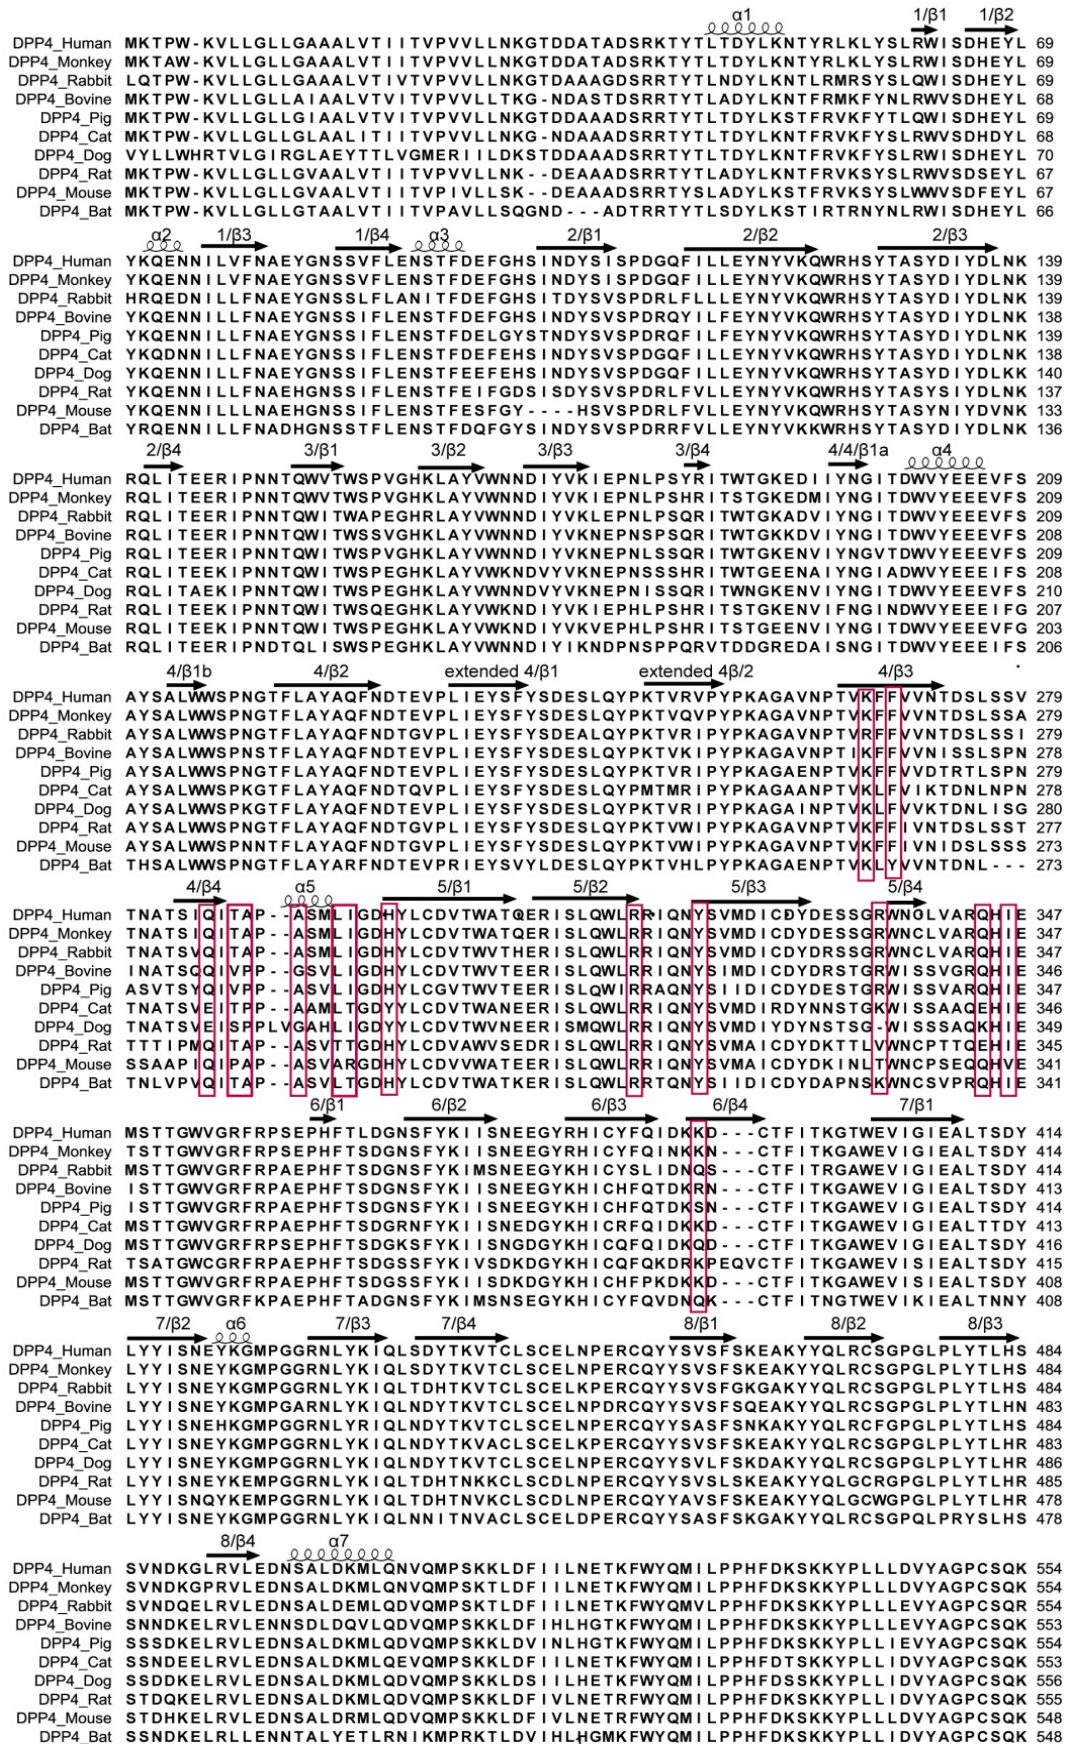

Supplementary information, Figure S5 Sequence alignment of DPP4 eight-bladed  $\beta$ -propeller domains from different species.  $\beta$ -strands are drawn as arrows, and  $\alpha$

helices are drawn as helical lines. The DPP4 residues involved in MERS-CoV RBD contact are highlighted in red boxes.
